# Supplementary material for: Methodological quality of public health guideline recommendations on vitamin D and calcium : a systematic review protocol
Source: PubMed Central journal article supplement — BMJ Open. 2019 Nov 7;9(11):e031840. doi: 10.1136/bmjopen-2019-031840 (PMC6858133; doi:10.1136/bmjopen-2019-031840), 2019-11-07
Supplement: bmjopen-2019-031840supp001.pdf [file bmjopen-2019-031840supp001.pdf]

**Supplemental material:** Medline search strategy via Ovid

1. Vitamin D/
2. Cholecalciferol/
3. Ergocalciferols/
4. Vitamin D Deficiency/
5. Sunlight/
6. Ultraviolet Rays/
7. Vit\* D.tw.
8. Ergocalciferol.tw.
9. Calciferol.tw.
10. Cholecalciferol.tw.
11. Sunlight.tw.
12. (Light adj3 expos\*).tw.
13. UV.tw.
14. Ultraviolet.tw.
15. or/1-14
16. exp Calcium/
17. Calcium, Dietary/
18. calcium.mp.
19. or/16-18
20. 15 or 19
21. Diet/
22. "Diet, Food, and Nutrition"/
23. Diet, Vegetarian/
24. Diet, Vegan/
25. Diet, Western/
26. Diet Therapy/
27. Healthy Diet/

28. Food, Fortified/
29. Dietary supplements/
30. exp Dairy Products/
31. Shellfish/
32. Fishes/
33. exp Seafood/
34. Vegetables/
35. exp Vegetable Products/
36. Agaricales/
37. Diet\*.tw.
38. (Diet\* adj3 supplement\*).tw.
39. (Fortified adj3 food\*).tw.
40. Vegetable\*.tw.
41. Mushroom\*.tw.
42. Dairy.tw.
43. Milk.tw.
44. Cheese.tw.
45. Yog?urt.tw.
46. Seafood.tw.
47. Fish.tw.
48. Shellfish.tw.
49. or/21-48
50. 20 or 49
51. 20 and 49
52. exp clinical pathway/
53. exp clinical protocol/
54. exp consensus/
55. exp consensus development conference/

56. exp consensus development conferences as topic/
57. critical pathways/
58. exp guideline/
59. guidelines as topic/
60. exp practice guideline/
61. practice guidelines as topic/
62. health planning guidelines/
63. (guideline or practice guideline or consensus development conference or consensus development conference, NIH).pt.
64. (position statement\* or policy statement\* or practice parameter\* or best practice\*).ti,ab,kf,kw.
65. (standards or guideline or guidelines).ti,kf,kw.
66. ((practice or treatment\* or clinical) adj guideline\*).ab.
67. (CPG or CPGs).ti.
68. consensus\*.ti,kf,kw.
69. consensus\*.ab. /freq=2
70. ((critical or clinical or practice) adj2 (path or paths or pathway or pathways or protocol\*).ti,ab,kf,kw.
71. recommendat\*.ti,kf,kw.
72. (care adj2 (standard or path or paths or pathway or pathways or map or maps or plan or plans)).ti,ab,kf,kw.
73. (algorithm\* adj2 (screening or examination or test or tested or testing or assessment\* or diagnosis or diagnoses or diagnosed or diagnosing)).ti,ab,kf,kw.
74. or/52-73
75. Osteoporosis/
76. Fractures, Bone/
77. Bone Density/
78. osteoporosis.tw.
79. fracture\*,bone.tw.
80. bone density.tw.

81. bone health.mp.
82. 75 or 76 or 77 or 78 or 79 or 80 or 81
83. Adult/
84. Aged/
85. Middle Aged/
86. adult\*.tw.
87. aged.tw.
88. middle aged.tw.
89. 83 or 84 or 85 or 86 or 87 or 88
90. 74 and 82 and 89
91. 50 and 90
